# Supplementary material
Source: ML conference proceedings conference paper supplement (https://openaccess.thecvf.com/content/CVPR_2020/html/Han_Neuromorphic_Camera_Guided_CVPR_2020_paper.html)
Supplement: Supplementary file 1 [file Han_Neuromorphic_Camera_Guided_CVPR_2020_supplemental.pdf]

# Neuromorphic Camera Guided High Dynamic Range Imaging

Jin Han<sup>1</sup> Chu Zhou<sup>1</sup> Peiqi Duan<sup>2</sup> Yehui Tang<sup>1</sup> Chang Xu<sup>3</sup> Chao Xu<sup>1</sup> Tiejun Huang<sup>2</sup> Boxin Shi<sup>2</sup>

<sup>1</sup>Key Laboratory of Machine Perception (MOE), Dept. of Machine Intelligence, Peking University

<sup>2</sup>National Engineering Laboratory for Video Technology, Dept. of Computer Science, Peking University

<sup>3</sup>School of Computer Science, Faculty of Engineering, University of Sydney

Supplementary Material

---

More Synthetic Results ----- pages 3-7

High Resolution Results ----- pages 8-16

To complement Fig. 6 in the paper with more examples, we show a set of additional synthetic reconstruction results using the proposed method and other comparing methods including DrTMO<sup>1</sup>, ExpandNet<sup>2</sup>, HDRCNN<sup>3</sup>, and traditional method<sup>4</sup> merging an over- and an under-exposed images with the exposure ratio of 50 : 1.

---

<sup>1</sup>Y. Endo, Y. Kanamori, and J. Mitani. Deep reverse tone mapping. ACM Transactions on Graphics, 36(6):177:1-177:10, 2017.

<sup>2</sup>D. Marnerides, T. Bashford-Rogers, J. Hatchett, and K. Debattista. ExpandNet: A deep convolutional neural network for high dynamic range expansion from low dynamic range content. In Computer Graphics Forum, volume 37, 2018.

<sup>3</sup>G. Eilertsen, J. Kronander, G. Denes, R. K. Mantiuk, and J. Unger. HDR image reconstruction from a single exposure using deep CNNs. ACM Transactions on Graphics, 36(6):178:1-178:15, 2017.

<sup>4</sup>P. E. Debevec and J. Malik. Recovering high dynamic range radiance maps from photographs. In Proc. of SIGGRAPH, 2017.

# More Synthetic Results

4

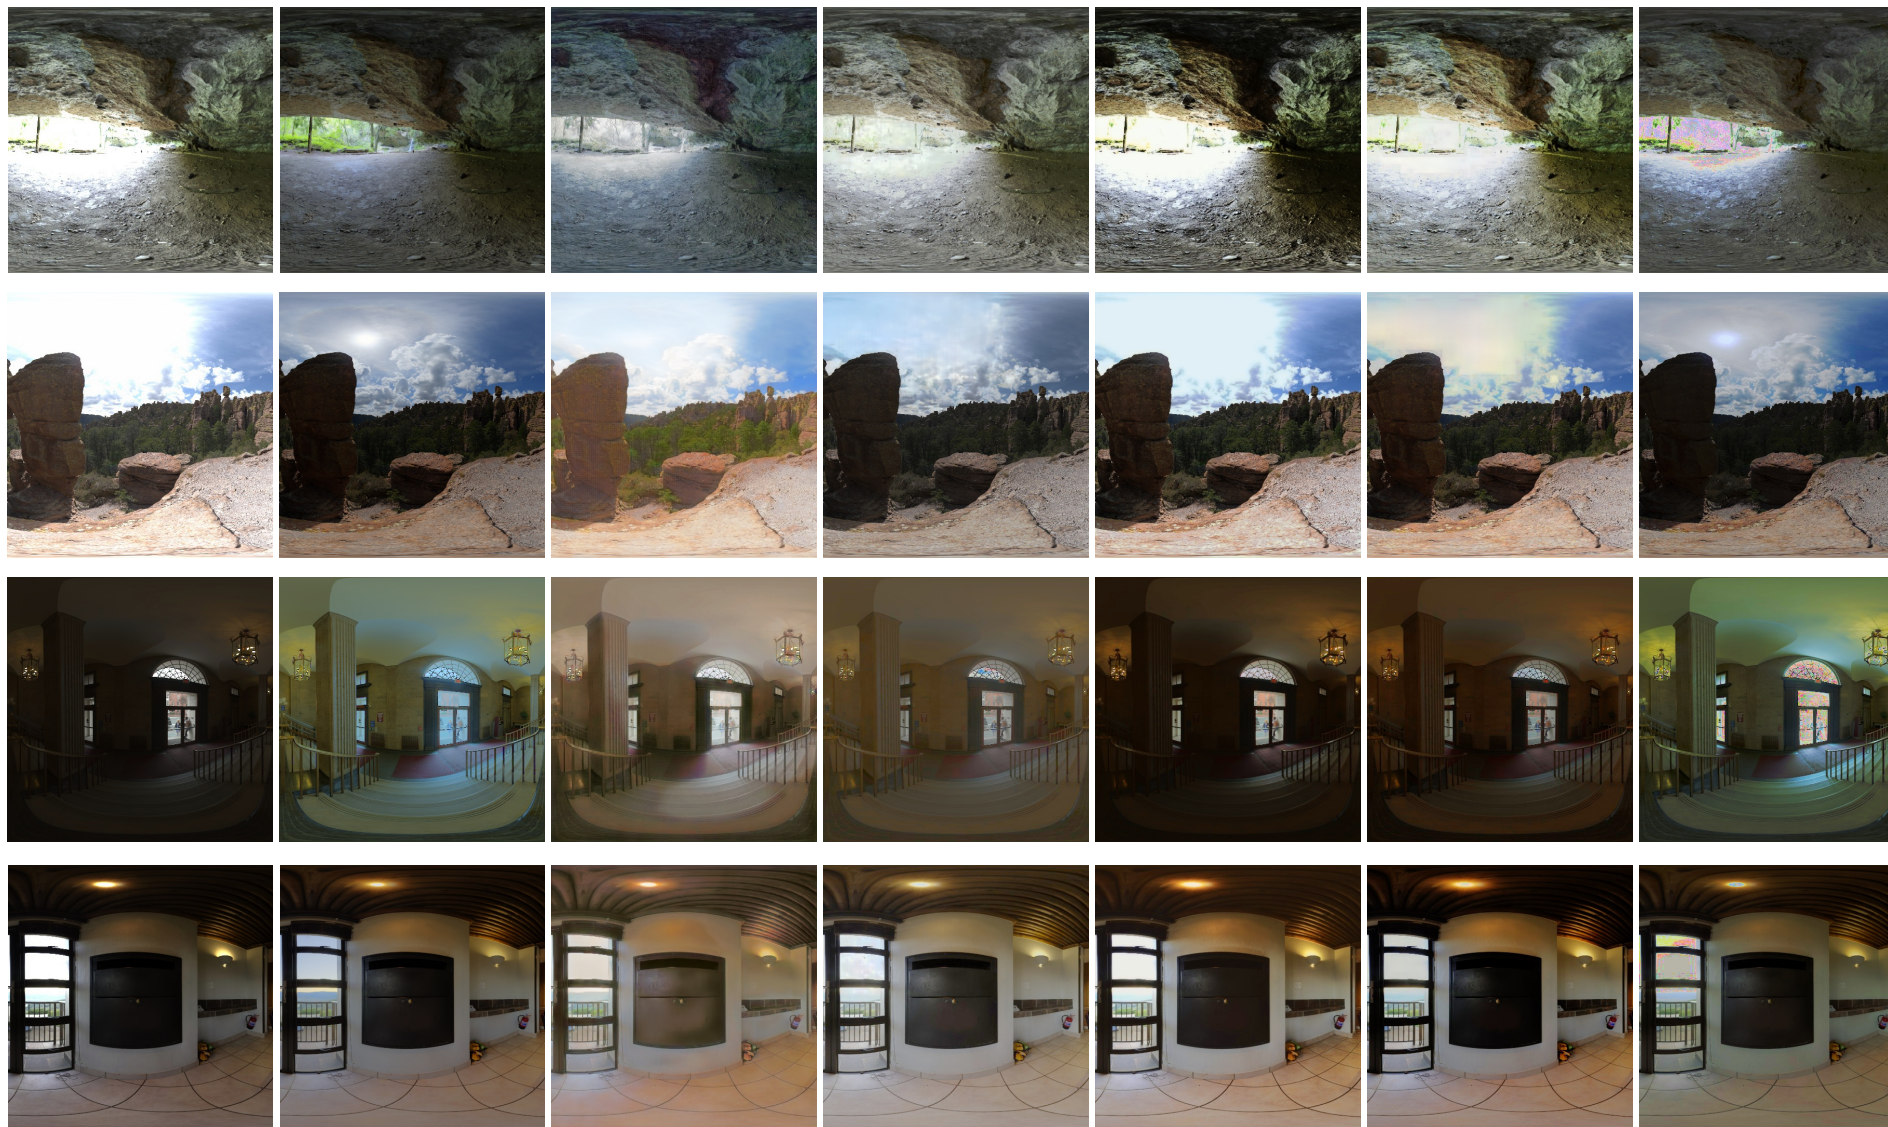

LDR

Ground truth

Ours

DrTMO

ExpandNet

HDRCNN

Merge 2 LDRs



# More Synthetic Results

5

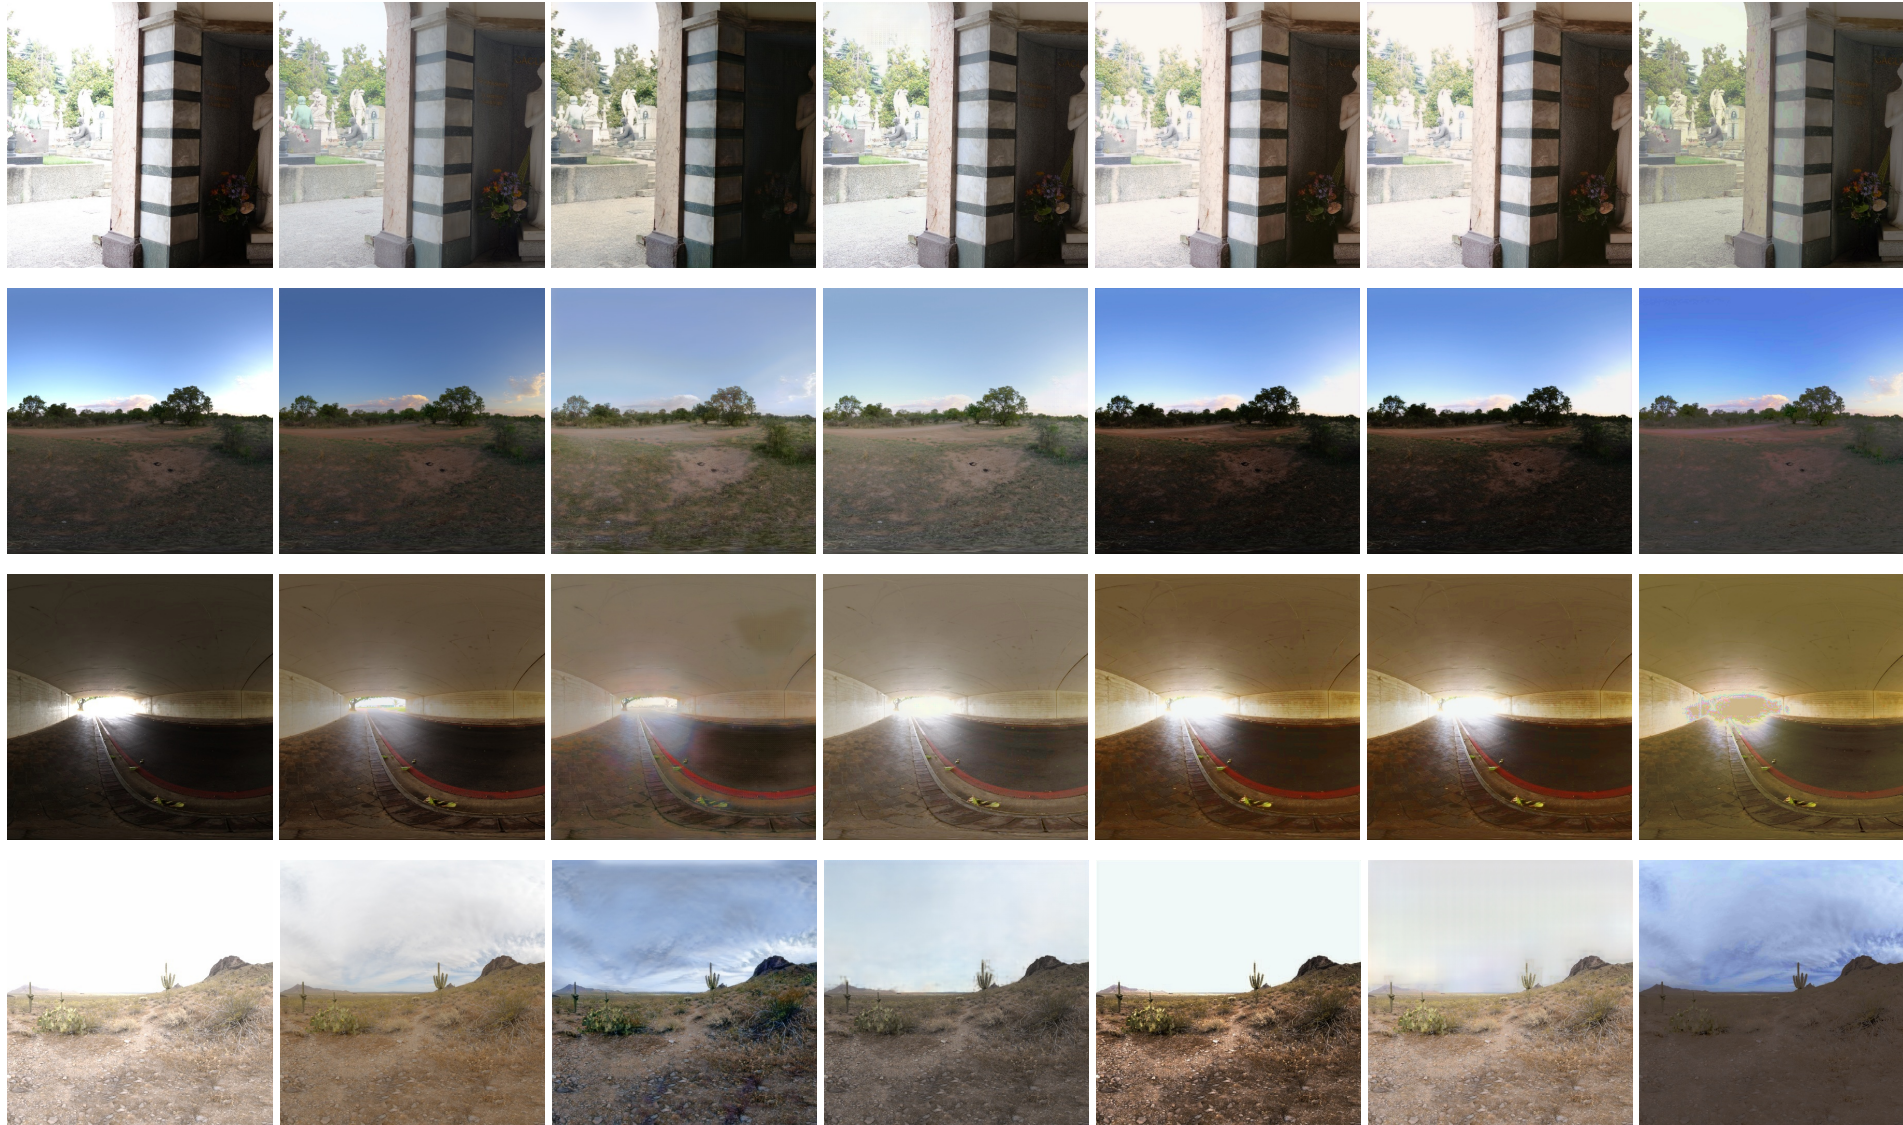

LDR

Ground truth

Ours

DrTMO

ExpandNet

HDRCNN

Merge 2 LDRs



# More Synthetic Results

6

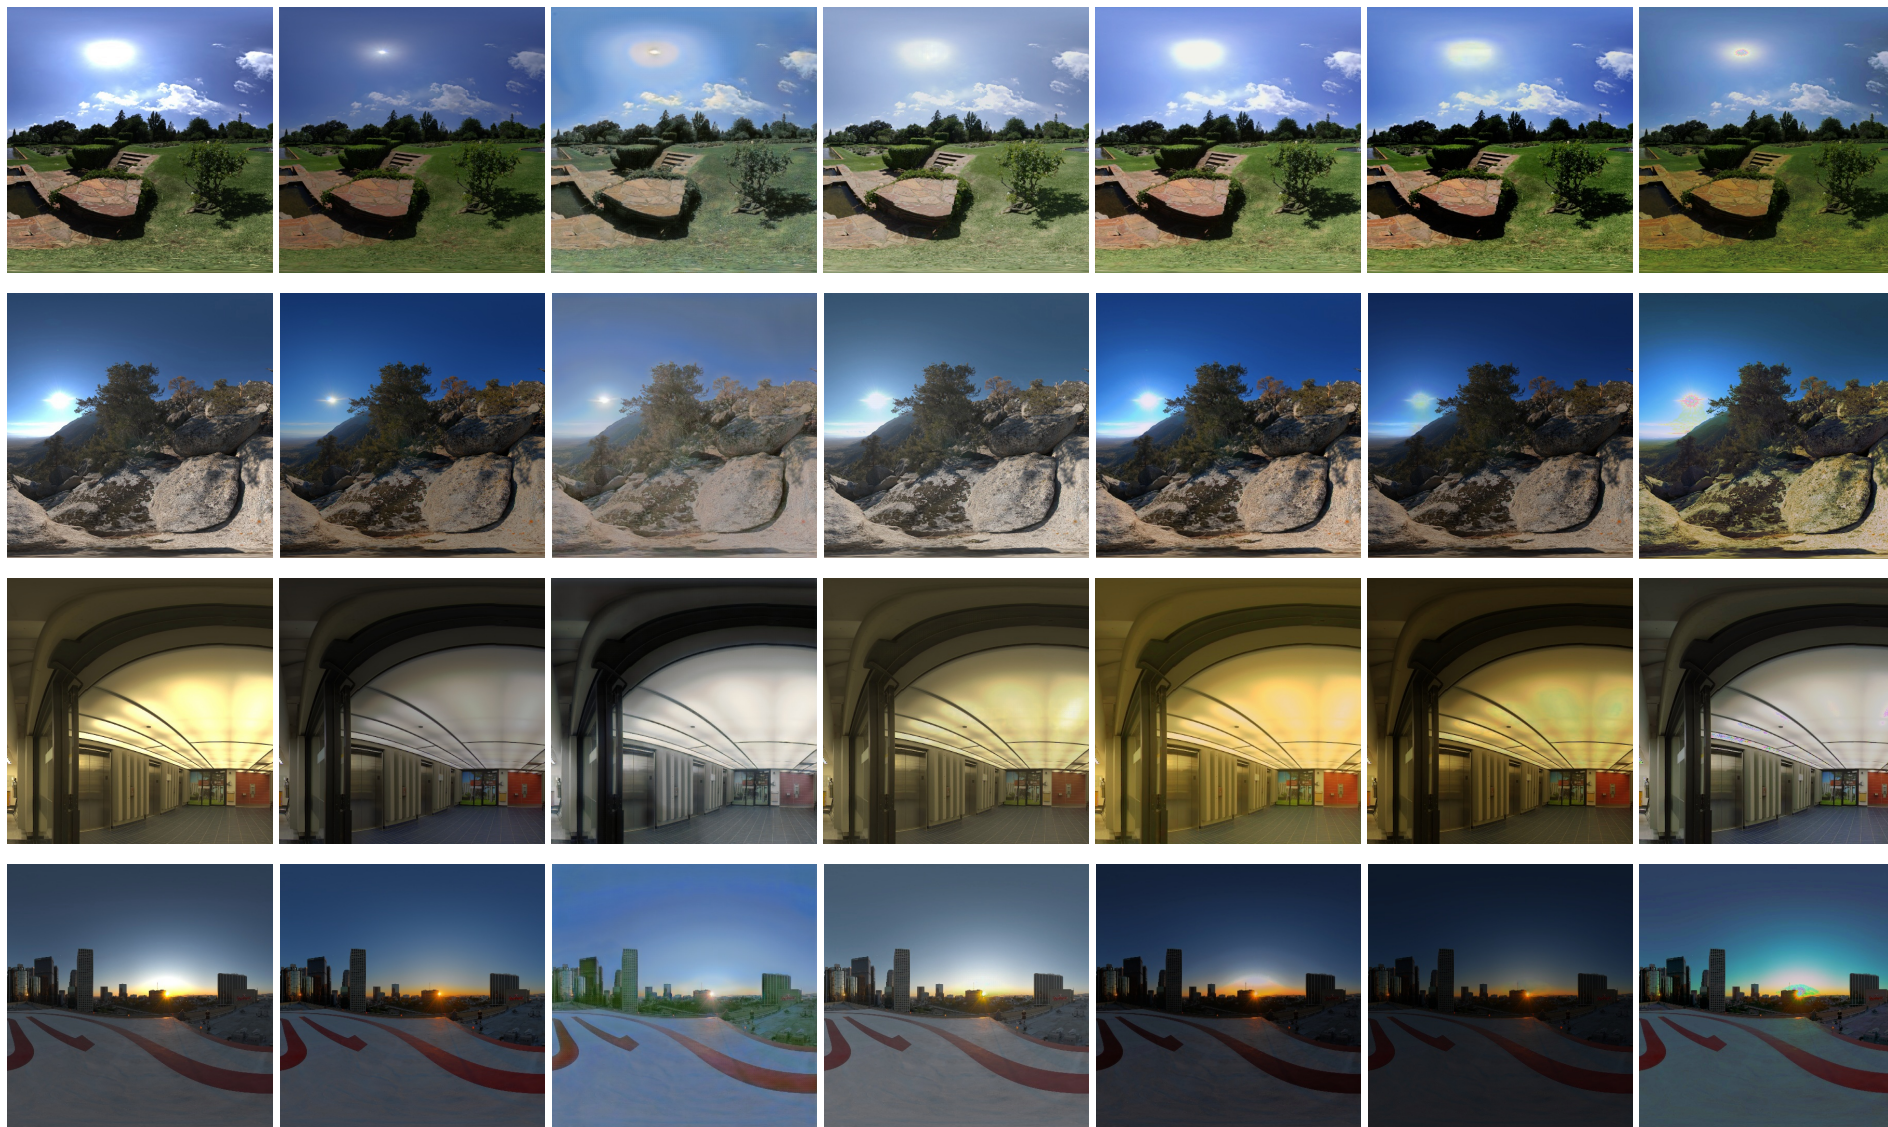

LDR

Ground truth

Ours

DrTMO

ExpandNet

HDRCNN

Merge 2 LDRs



# More Synthetic Results

7

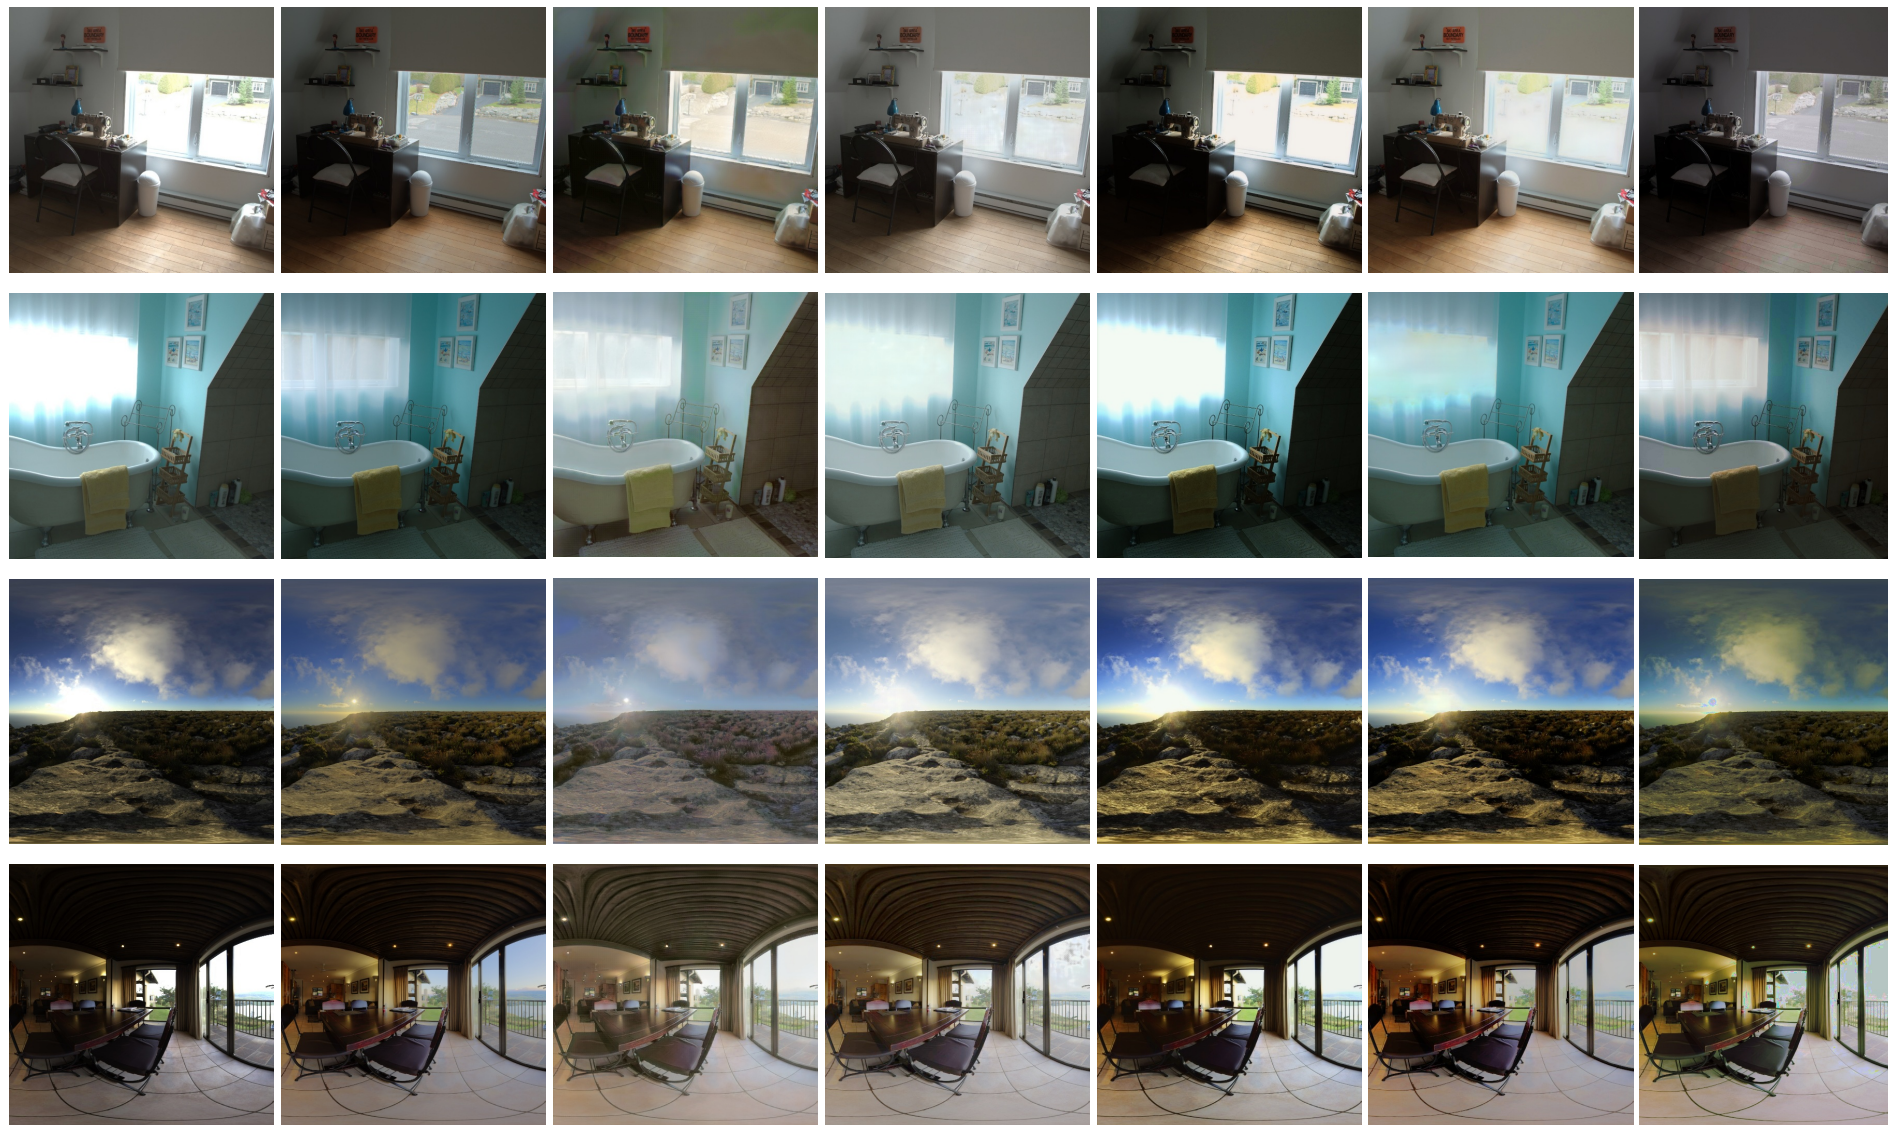

LDR

Ground truth

Ours

DrTMO

ExpandNet

HDRCNN

Merge 2 LDRs

To achieve higher resolution reconstruction results, we upsample the intensity maps using bicubic interpolation to the corresponding scale level with LDR images, *e.g.*, a  $1024 \times 1024$  LDR image with a  $512 \times 512$  upsampled intensity map. We denote the results upsampled with this method as ① in the following slides.

Another option is using a pre-trained super-resolution network<sup>5</sup> to increase the spatial resolution of the output HDR images. We denote the results upsampled with this method as ② in the following slides.

We conduct super-resolution experiments on both synthetic data (pages 9-13) and real-world data (pages 14-16).

---

<sup>5</sup>B. Lim, S. Son, H. Kim, S. Nah, and K. M. Lee. Enhanced Deep Residual Networks for Single Image Super-resolution. 2<sup>nd</sup> NTIRE: New Trends in Image Restoration and Enhancement workshop and challenge on image super-resolution in conjunction with CVPR 2017.



# High Resolution Synthetic Data Results

9

①

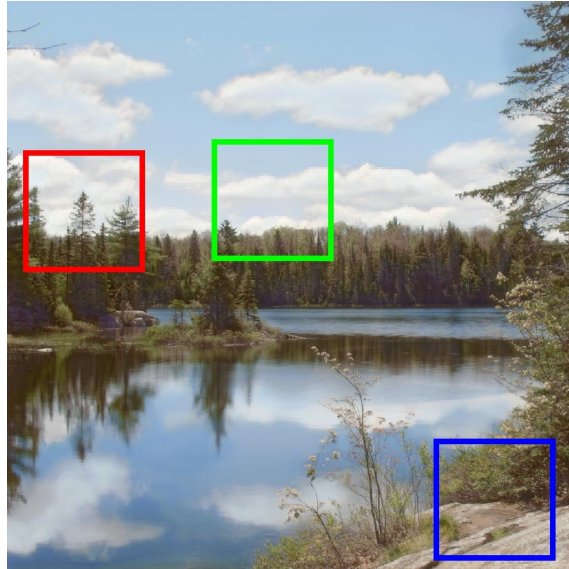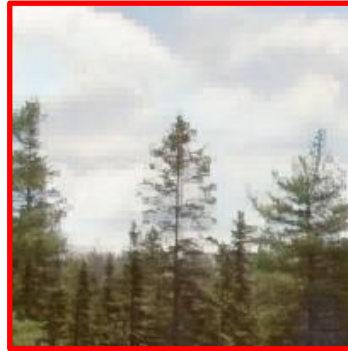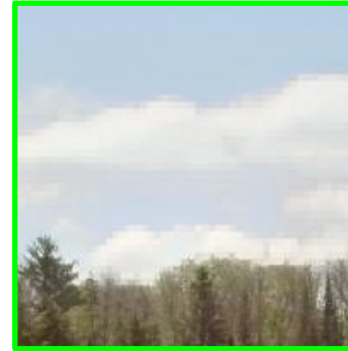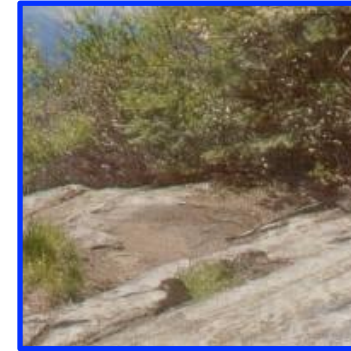

①

Low resolution  
corresponding  
parts

②

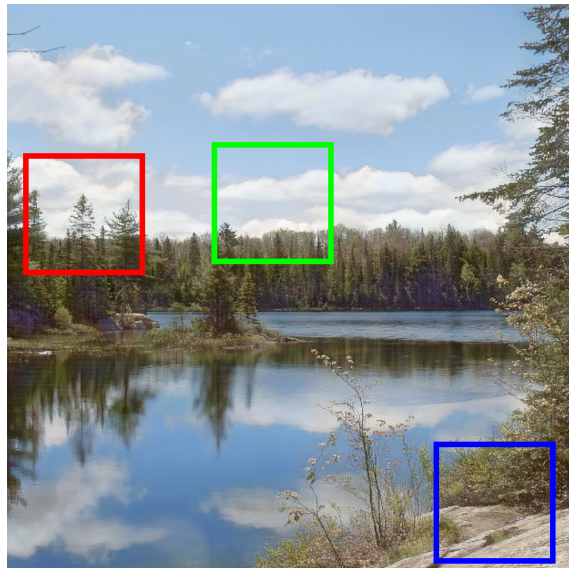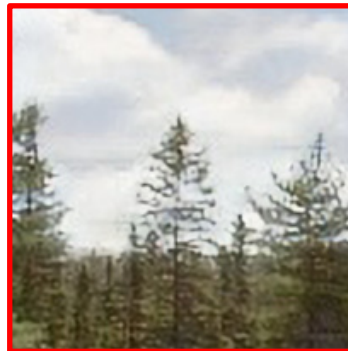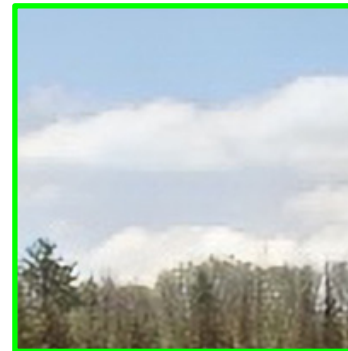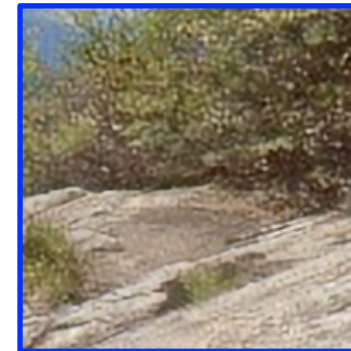

②

①

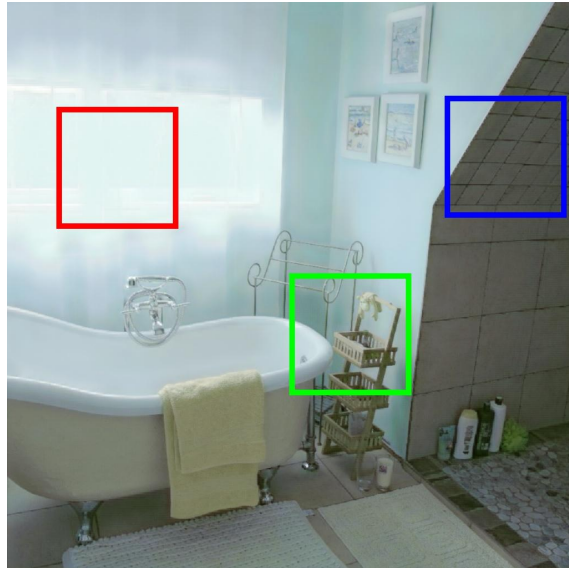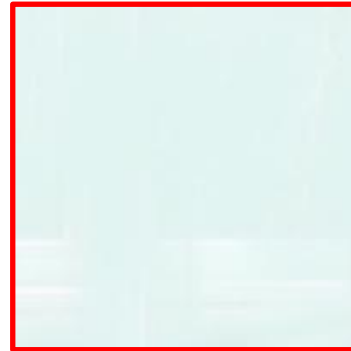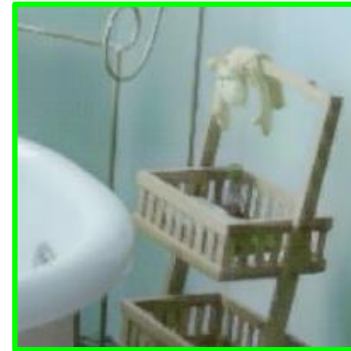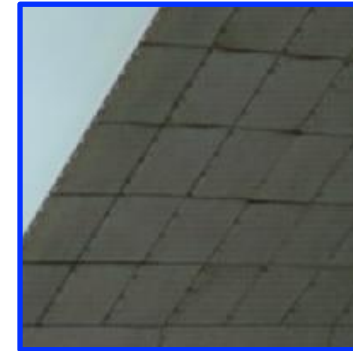

①

Low resolution  
corresponding  
parts

②

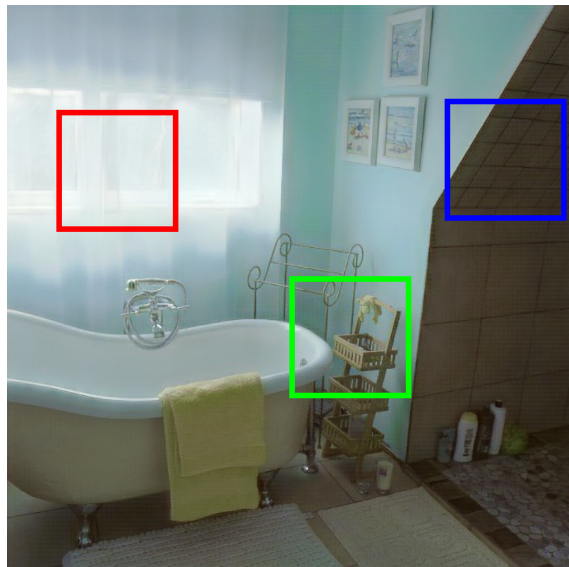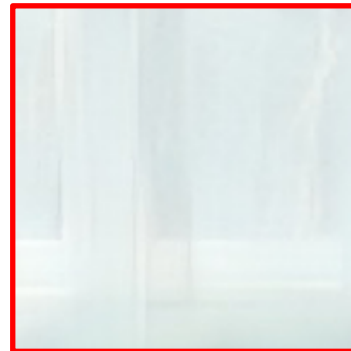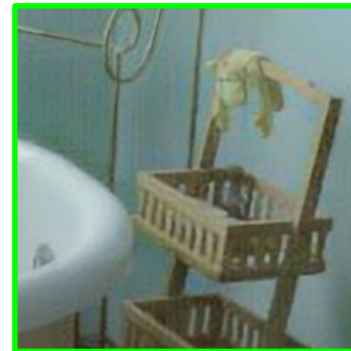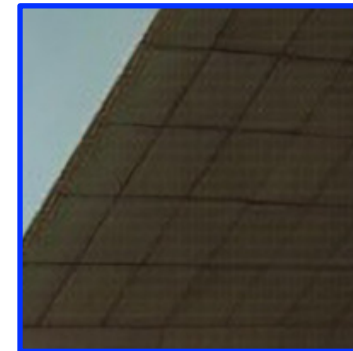

②



①

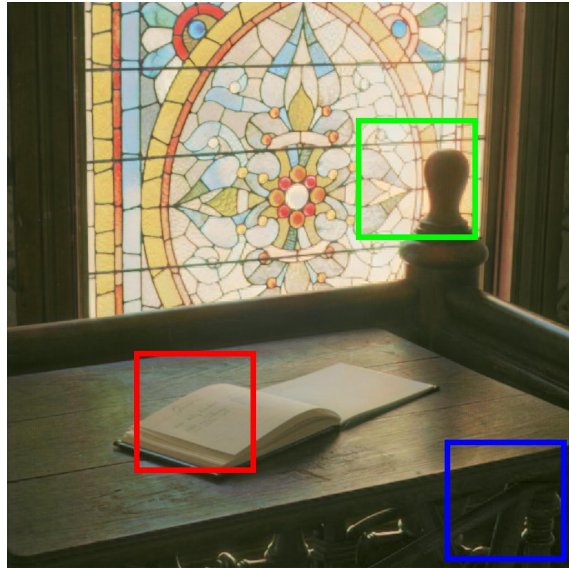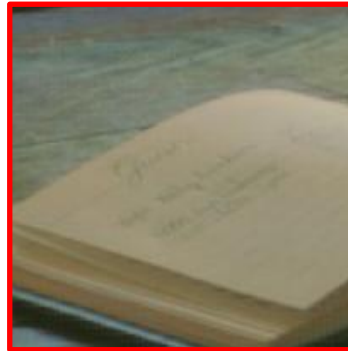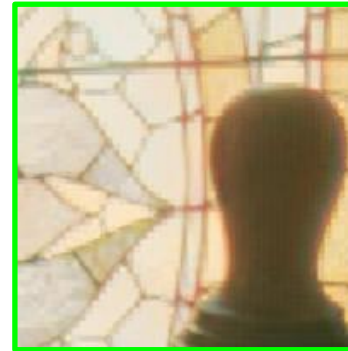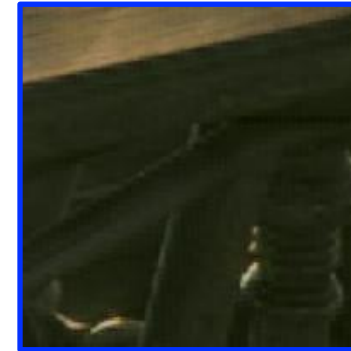

①

Low resolution  
corresponding  
parts

②

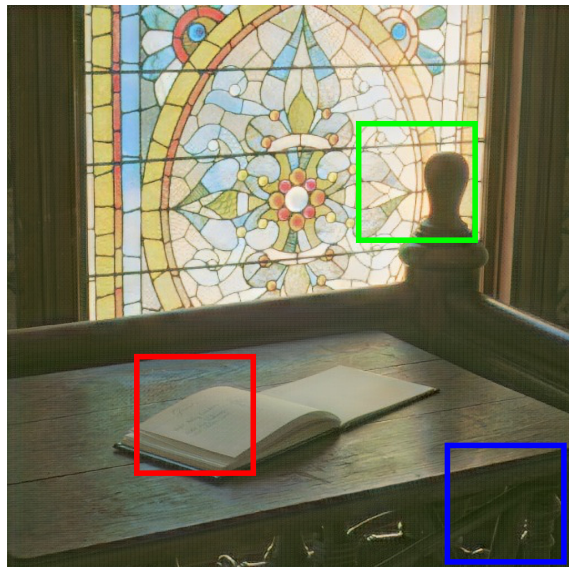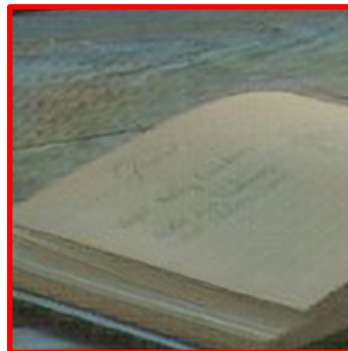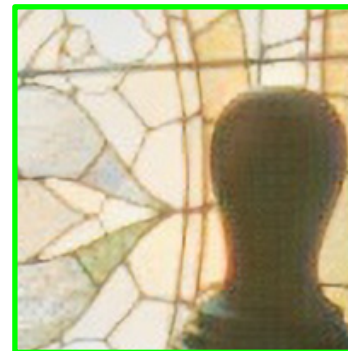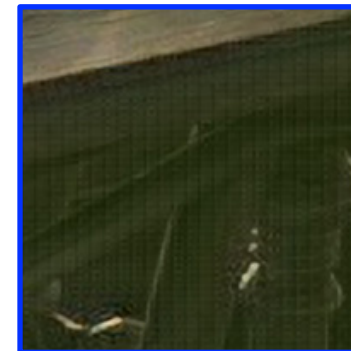

②

①

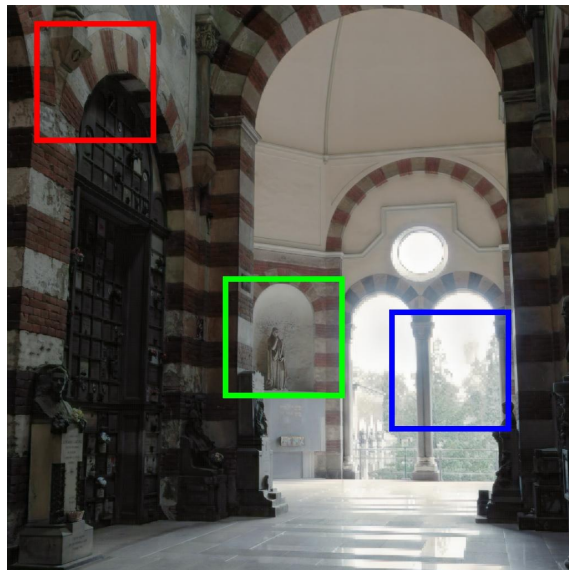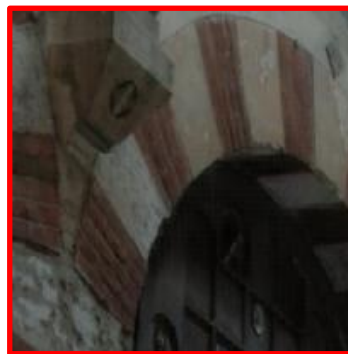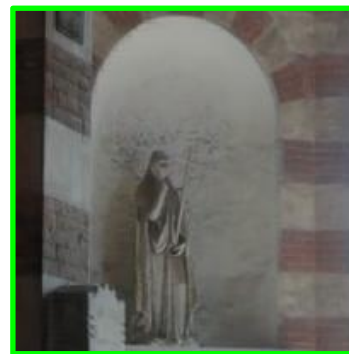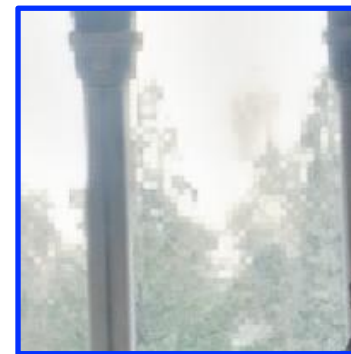

①

Low resolution  
corresponding  
parts

②

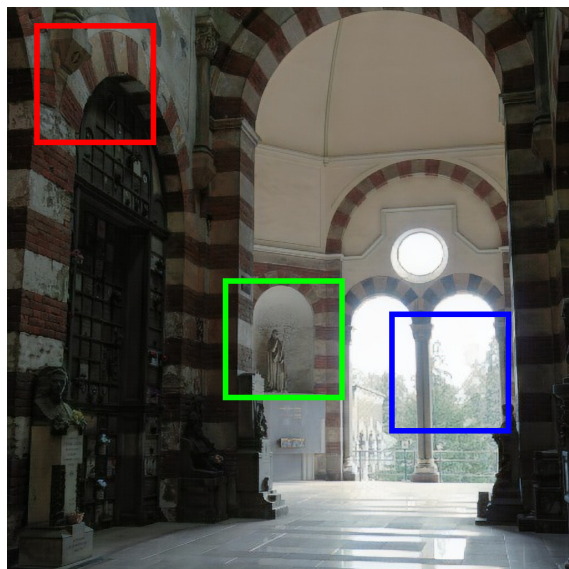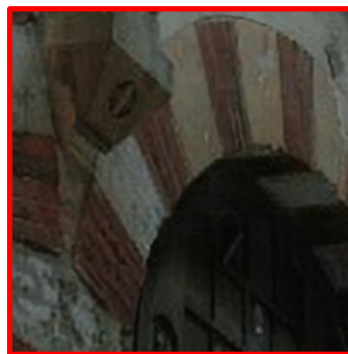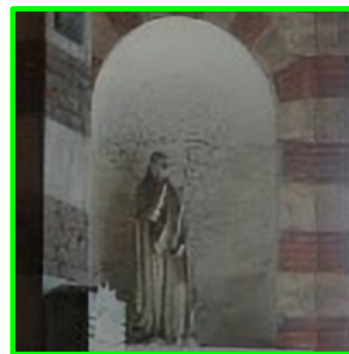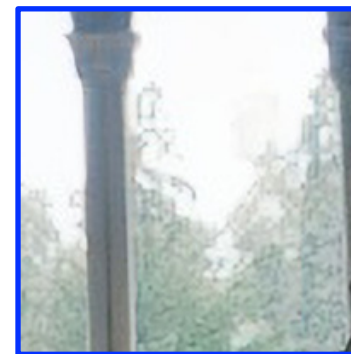

②



①

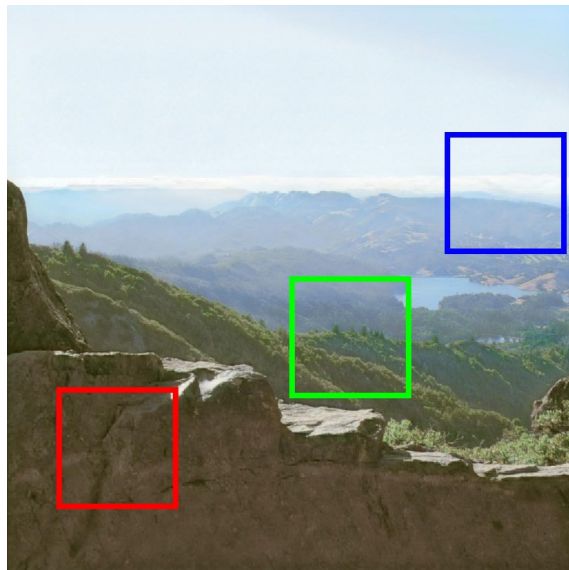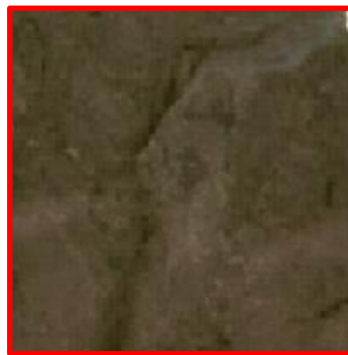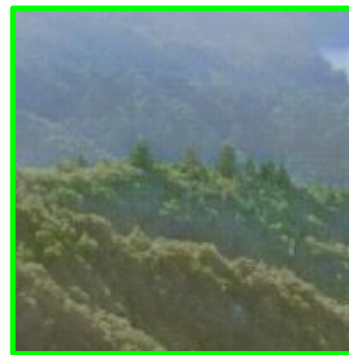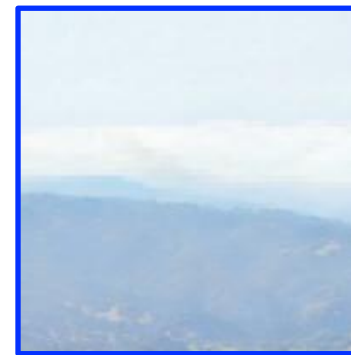

①

Low resolution  
corresponding  
parts

②

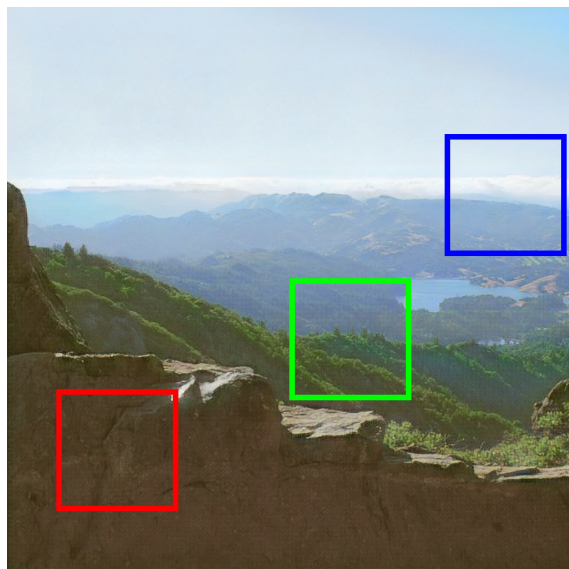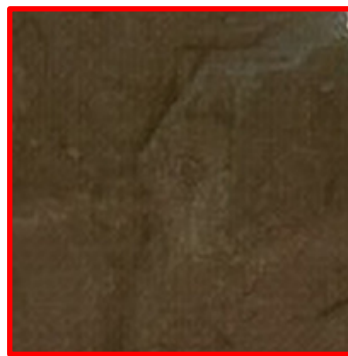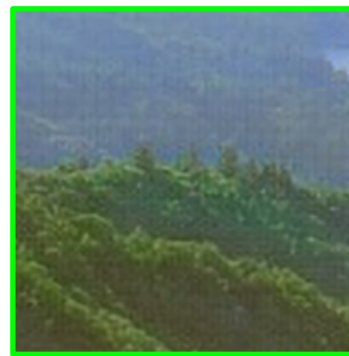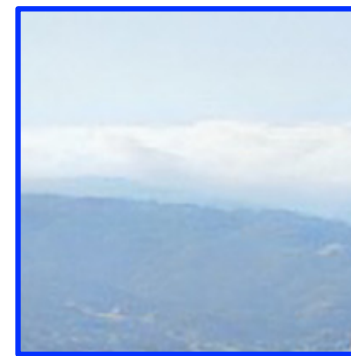

②

①

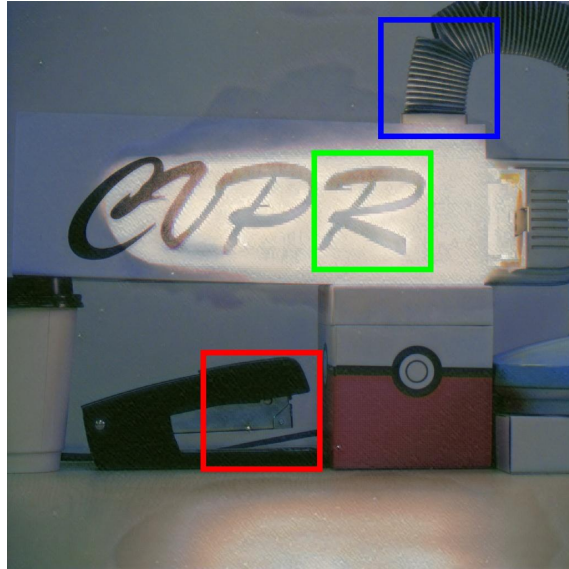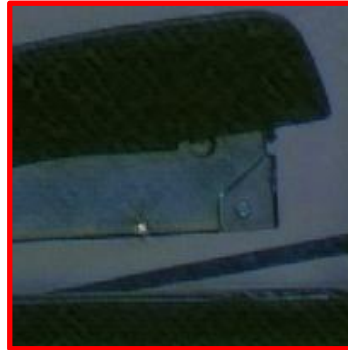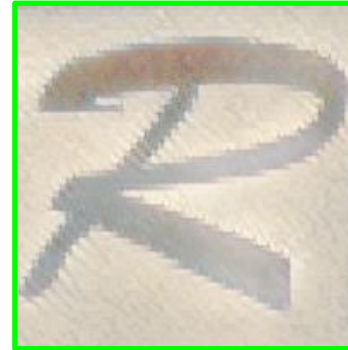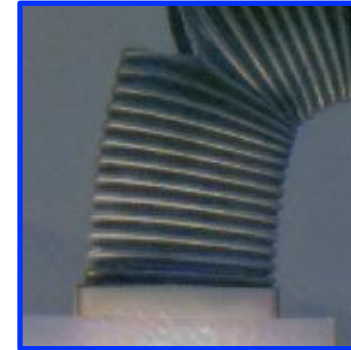

①

Low resolution  
corresponding  
parts

②

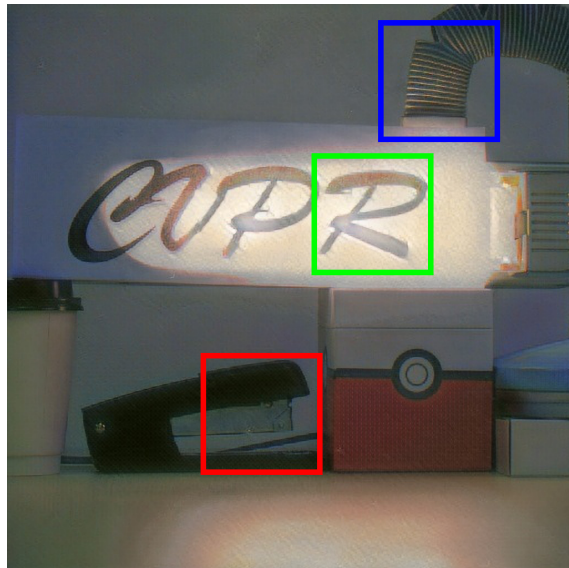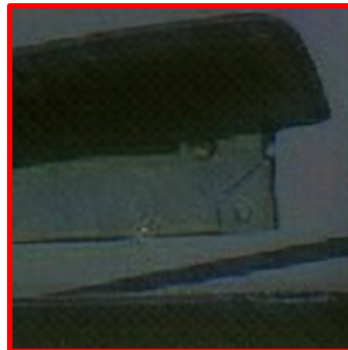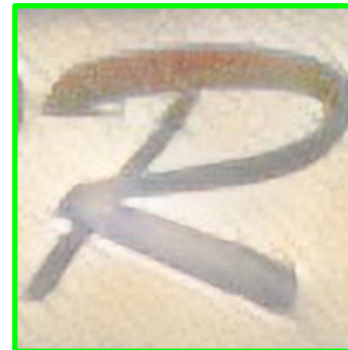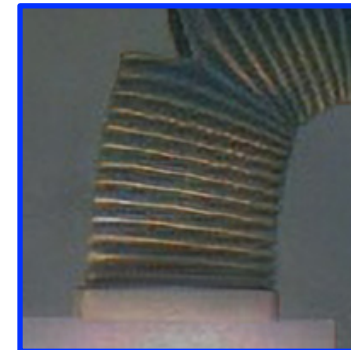

②



①

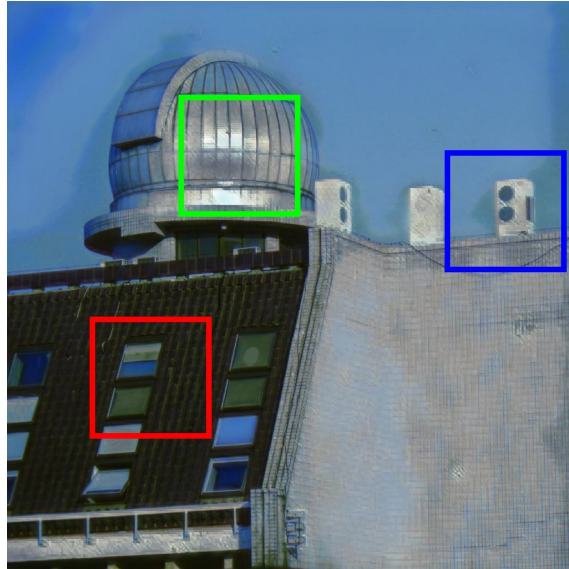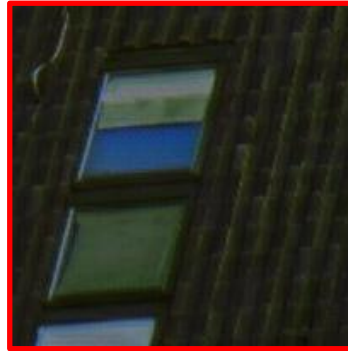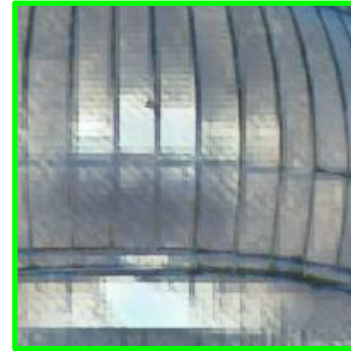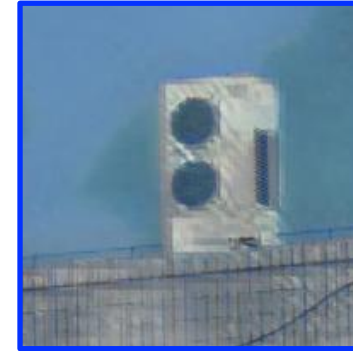

①

Low resolution  
corresponding  
parts

②

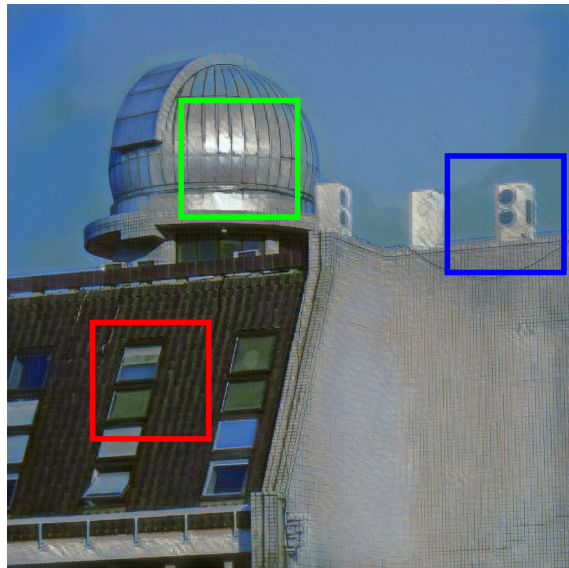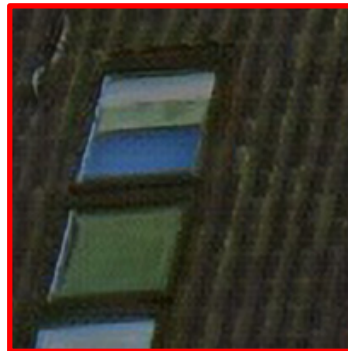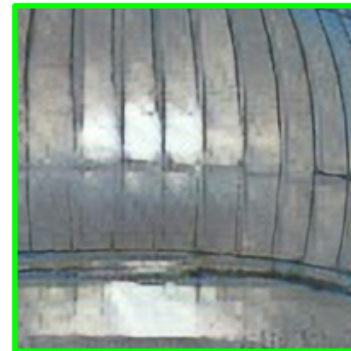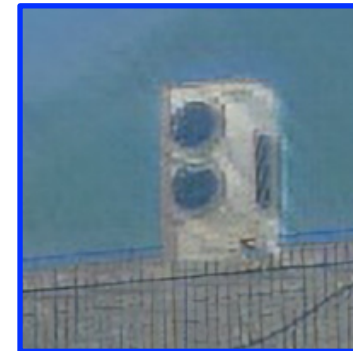

②

①

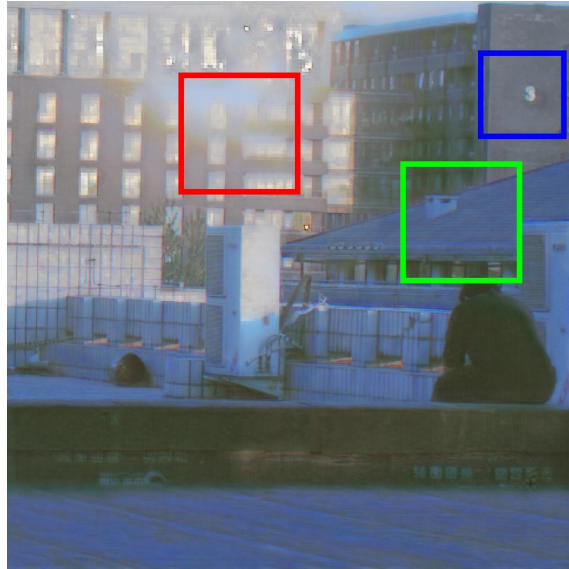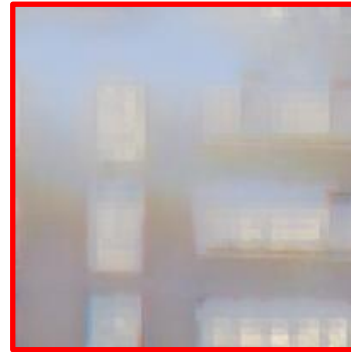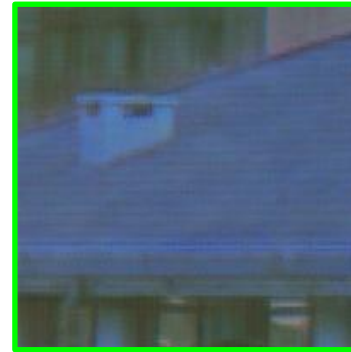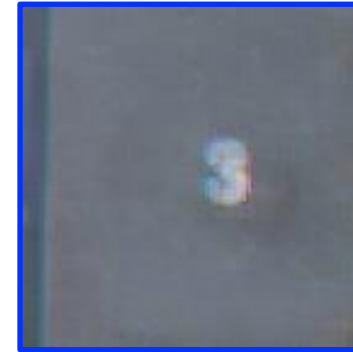

①

Low resolution  
corresponding  
parts

②

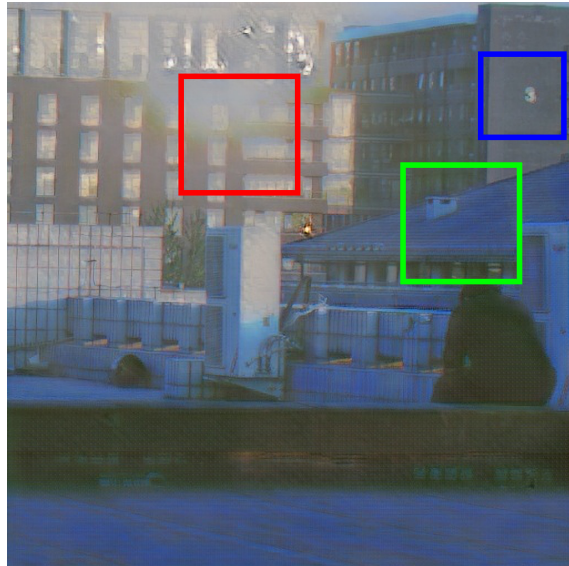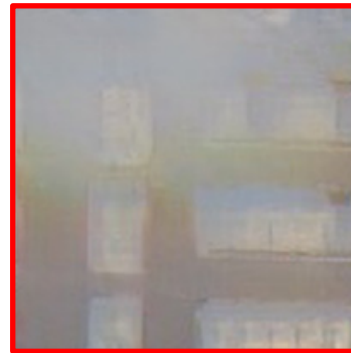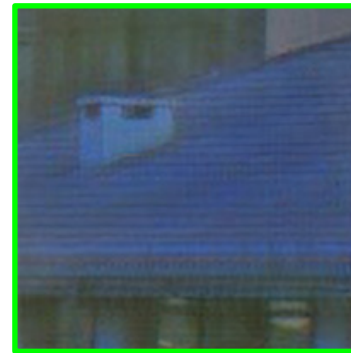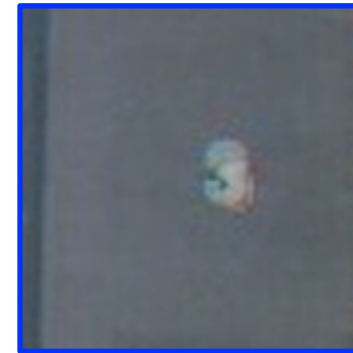

②
